# Supplementary material
Source: PubMed Central journal article supplement (PMC4357962)
Supplement: AEM.00051-15_zam999116138so1.pdf [file AEM.00051-15_zam999116138so1.pdf]

Table S1. Environmental sample types collected at each farm during the fall 2012 and spring 2013 leafy greens growing season.

| Farm <sup>a</sup> | Farm System  | Dates Sampled                                                                                       | Samples Collected Each Date                                                                                                                                                   | Number of Samples<br>(N=577) |
|-------------------|--------------|-----------------------------------------------------------------------------------------------------|-------------------------------------------------------------------------------------------------------------------------------------------------------------------------------|------------------------------|
| DE1               | organic      | 13 May 2013<br>20 May 2013<br>28 May 2013                                                           | leafy greens; soil; groundwater<br>leafy greens; groundwater<br>leafy greens; groundwater                                                                                     | 20                           |
| DE3               | organic      | 24 September 2012<br>9 October 2012<br>22 October 2012                                              | leafy greens; compost; groundwater<br>leafy greens; groundwater<br>leafy greens; compost; groundwater                                                                         | 16                           |
| DE4*              | organic      | 9 October 2012<br>22 October 2012<br>13 November 2012                                               | leafy greens; compost; groundwater<br>leafy greens; groundwater<br>leafy greens                                                                                               | 13                           |
| DE5*              | organic      | 15 October 2012<br>13 November 2012                                                                 | leafy greens; compost; groundwater<br>leafy greens                                                                                                                            | 8                            |
| DE6*              | organic      | 13 May 2013<br>20 May 2013<br>28 May 2013                                                           | leafy greens; soil; groundwater<br>leafy greens; groundwater<br>leafy greens; groundwater                                                                                     | 17                           |
| ES1*              | organic      | 24 September 2012<br>9 October 2012<br>22 October 2012                                              | leafy greens; soil; groundwater<br>leafy greens; groundwater<br>leafy greens; groundwater                                                                                     | 16                           |
| ES3*              | organic      | 1 October 2012<br>15 October 2012<br>13 November 2012                                               | leafy greens; soil; groundwater<br>leafy greens; groundwater<br>leafy greens                                                                                                  | 13                           |
| ES7               | conventional | 15 October 2012<br>22 October 2012<br>13 November 2012                                              | leafy greens; soil; groundwater<br>leafy greens; groundwater<br>leafy greens                                                                                                  | 16                           |
| ES8*              | organic      | 24 September 2012<br>9 October 2012<br>22 October 2012                                              | soil; groundwater<br>leafy greens; groundwater<br>leafy greens; soil; groundwater                                                                                             | 13                           |
| ES9*              | organic      | 13 May 2013<br>20 May 2013<br>28 May 2013                                                           | leafy greens; soil; pond water;<br>groundwater<br>leafy greens; soil; pond water;<br>groundwater<br>leafy greens; pond water; groundwater                                     | 22                           |
| MD2*              | organic      | 24 September 2012<br>9 October 2012<br>22 October 2012<br>13 May 2013<br>20 May 2013<br>28 May 2013 | leafy greens; soil; groundwater<br>leafy greens<br>leafy greens; municipal water<br>leafy greens; soil; groundwater<br>leafy greens; groundwater<br>leafy greens; groundwater | 34                           |
| MD4*              | conventional | 1 October 2012                                                                                      | leafy greens; pond water                                                                                                                                                      | 5                            |
| MD6*              | conventional | 13 May 2013<br>20 May 2013<br>28 May 2013                                                           | leafy greens; soil; pond water<br>leafy greens; pond water<br>leafy greens; pond water                                                                                        | 18                           |
| MD7*              | conventional | 1 October 2012<br>15 October 2012<br>13 November 2012                                               | leafy greens; pond water<br>leafy greens; soil; sediment; pond water<br>leafy greens                                                                                          | 19                           |
| MD8*              | organic      | 24 September 2012<br>9 October 2012<br>22 October 2012                                              | leafy greens; soil; pond water<br>leafy greens; pond water<br>leafy greens                                                                                                    | 15                           |
| MD9*              | conventional | 1 October 2012<br>15 October 2012<br>13 November 2012                                               | leafy greens; soil; river water<br>leafy greens; sediment<br>leafy greens                                                                                                     | 16                           |

|             |                                         |                   |                                          |    |
|-------------|-----------------------------------------|-------------------|------------------------------------------|----|
| MD10*       | organic                                 | 9 October 2012    | leafy greens; soil; municipal water      | 13 |
|             |                                         | 22 October 2012   | leafy greens; compost                    |    |
|             |                                         | 13 May 2013       | leafy green; compost                     |    |
| MD11*       | conventional                            | 13 May 2013       | leafy greens; soil                       | 10 |
|             |                                         | 20 May 2013       | leafy greens                             |    |
| MD12*       | organic                                 | 13 May 2013       | leafy greens; soil; groundwater          | 10 |
|             |                                         | 20 May 2013       | leafy greens; groundwater                |    |
| NJ5*        | organic                                 | 24 September 2012 | leafy greens; compost; groundwater       | 13 |
|             |                                         | 9 October 2012    | leafy greens; compost; groundwater       |    |
|             |                                         | 22 October 2012   | leafy greens; compost                    |    |
| NJ6         | organic                                 | 24 September 2012 | leafy greens; soil; groundwater          | 13 |
|             |                                         | 9 October 2012    | leafy greens; soil; groundwater          |    |
|             |                                         | 22 October 2012   | leafy greens; soil; groundwater          |    |
| NJ7         | organic                                 | 24 September 2012 | leafy greens; soil; groundwater          | 36 |
|             |                                         | 9 October 2012    | leafy greens; soil; groundwater          |    |
|             |                                         | 22 October 2012   | leafy greens; soil; groundwater          |    |
|             |                                         | 13 May 2013       | leafy greens; soil; compost; pond water  |    |
|             |                                         | 20 May 2013       | leafy greens; soil; compost; pond water  |    |
| 28 May 2013 | leafy greens; soil; compost; pond water |                   |                                          |    |
| NJ8         | organic                                 | 24 September 2012 | leafy greens; soil; groundwater          | 13 |
|             |                                         | 9 October 2012    | leafy greens; soil; groundwater          |    |
|             |                                         | 22 October 2012   | leafy greens; soil; groundwater          |    |
| NJ9*        | conventional                            | 1 October 2012    | leafy greens; soil; groundwater          | 16 |
|             |                                         | 15 October 2012   | leafy greens; soil; groundwater          |    |
|             |                                         | 13 November 2012  | leafy greens                             |    |
| NJ10*       | conventional                            | 1 October 2012    | leafy greens; soil; groundwater          | 36 |
|             |                                         | 15 October 2012   | leafy greens; soil; groundwater          |    |
|             |                                         | 13 November 2012  | leafy greens                             |    |
|             |                                         | 13 May 2013       | leafy greens; soil; groundwater          |    |
|             |                                         | 20 May 2013       | leafy greens; soil; groundwater          |    |
| 28 May 2013 | leafy greens; soil; groundwater         |                   |                                          |    |
| NJ11*       | conventional                            | 1 October 2012    | leafy greens; soil; groundwater          | 37 |
|             |                                         | 15 October 2012   | leafy greens; soil; groundwater          |    |
|             |                                         | 13 November 2012  | leafy greens                             |    |
|             |                                         | 13 May 2013       | leafy greens; soil; groundwater          |    |
|             |                                         | 20 May 2013       | leafy greens; soil; groundwater          |    |
| 28 May 2013 | leafy greens; soil; groundwater         |                   |                                          |    |
| NJ12*       | conventional                            | 1 October 2012    | leafy greens; soil; groundwater          | 16 |
|             |                                         | 15 October 2012   | leafy greens; soil; groundwater          |    |
|             |                                         | 13 November 2012  | leafy greens                             |    |
| NJ13*       | conventional                            | 13 May 2013       | leafy greens; soil; groundwater          | 21 |
|             |                                         | 20 May 2013       | leafy greens; soil; groundwater          |    |
|             |                                         | 28 May 2013       | leafy greens; soil; groundwater          |    |
| NJ14*       | conventional                            | 13 May 2013       | leafy greens; soil; sediment; pond water | 21 |
|             |                                         | 20 May 2013       | leafy greens; soil; sediment; pond water |    |
|             |                                         | 28 May 2013       | leafy greens; soil; sediment; pond water |    |
| NJ15*       | conventional                            | 13 May 2013       | leafy greens; groundwater                | 22 |
|             |                                         | 20 May 2013       | leafy greens; soil; groundwater          |    |
|             |                                         | 28 May 2013       | leafy greens; soil; groundwater          |    |
| NJ16*       | conventional                            | 13 May 2013       | leafy greens; soil; sediment; pond water | 20 |
|             |                                         | 20 May 2013       | leafy greens; soil; pond water           |    |
|             |                                         | 28 May 2013       | leafy greens; soil; sediment; pond water |    |
| NJ17*       | conventional                            | 13 May 2013       | leafy greens; soil; pond water           | 19 |
|             |                                         | 20 May 2013       | leafy greens; soil; sediment; pond water |    |
|             |                                         | 28 May 2013       | leafy greens; soil; sediment             |    |

<sup>a</sup> Farm code designates general geographical location. ES = Eastern shore of Maryland; DE = Delaware; MD = Central Maryland (excluding Eastern shore); NJ = New Jersey. Number randomly assigned to each farm. \* indicates farmer used overhead sprinkler irrigation. Leafy greens included random and targeted samples. All water samples included irrigation water source and end of the irrigation system samples. Sediment was only collected when a surface water source (pond or creek) was used for leafy greens irrigation. Compost was only collected when available.
